# Supplementary material for: Breast‐conserving therapy shows better prognosis in mucinous breast carcinoma compared with mastectomy: A SEER population‐based study
Source: PubMed Central journal article supplement (PMC7402828; doi:10.1002/cam4.3202), 2020-06-08
Supplement: CAM4-9-5381-s001.pdf [file CAM4-9-5381-s001.pdf]

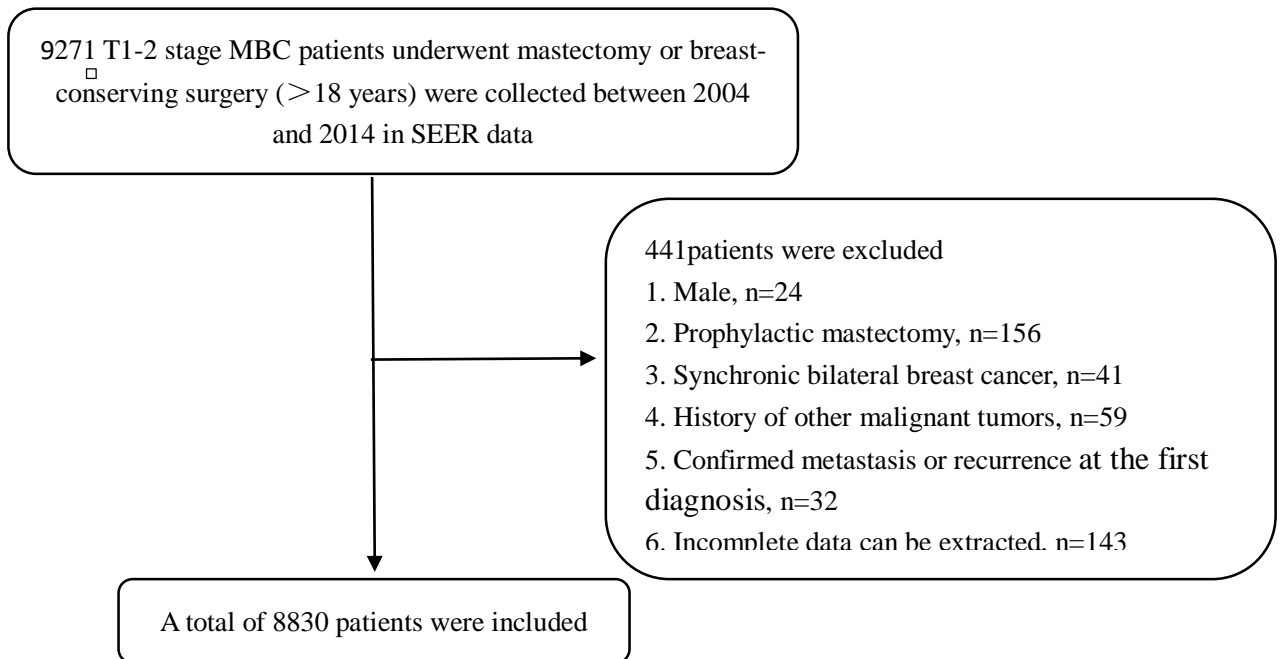

Supplementary Fig. 1. Flow diagram of patient selection.
